# Supplementary material for: Identification of Molecular Basis for Objective Discrimination of Breast Cancer Cells (MCF-7) from Normal Human Mammary Epithelial Cells by Raman Microspectroscopy and Multivariate Curve Resolution Analysis
Source: PubMed Central journal article supplement (PMC7830327; doi:10.3390/ijms22020800), 2021-01-14
Supplement: ijms-22-00800-s001.pdf [file ijms-22-00800-s001.pdf]

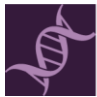

Article

# Identification of Molecular Basis for Objective Discrimination of Breast Cancer Cells (MCF-7) from Normal Human Mammary Epithelial Cells by Raman Microspectroscopy and Multivariate Curve Resolution Analysis

Keita Iwasaki <sup>1</sup>, Asuka Araki <sup>2</sup>, Murali Krishna C <sup>3</sup>, Riruke Maruyama <sup>2</sup>, Tatsuyuki Yamamoto <sup>4,5,\*</sup> and Hemanth Noothalapati <sup>5,6,\*</sup>

<sup>1</sup> The United Graduate School of Agricultural Sciences, Tottori University, Tottori 680-8550, Japan; d17a3003@matsu.shimane-u.ac.jp

<sup>2</sup> Department of Organ Pathology, Faculty of Medicine, Shimane University, Izumo 693-8501, Japan; asuka@med.shimane-u.ac.jp (A.A.); hm5995@med.shimane-u.ac.jp (R.M.)

<sup>3</sup> Advanced Centre for Treatment, Research and Education in Cancer, Tata Memorial Centre, 410-210 Navi Mumbai, India; pittu1043@gmail.com

<sup>4</sup> Faculty of Life and Environmental Science, Shimane University, Matsue 690-8504, Japan

<sup>5</sup> Raman Project Center for Medical and Biological Applications, Shimane University, Matsue 690-8504, Japan

<sup>6</sup> Research Administration Office, Shimane University, Matsue 690-8504, Japan

\* Correspondence: tyamamot@life.shimane-u.ac.jp (T.Y.); nvhnag@life.shimane-u.ac.jp (H.N.)

## Supplementary Information

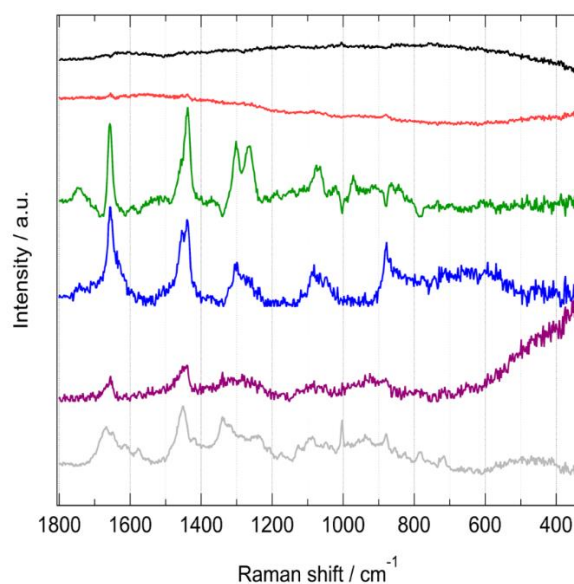

**Figure S1.** Preliminary MCR analysis of whole fingerprint region (1800–370  $\text{cm}^{-1}$ ). No significant bands were observed below 750  $\text{cm}^{-1}$ .
